# Supplementary material for: Highly effective production of levulinic acid and γ-valerolactone through self-circulation of solvent in a continuous process
Source: Royal Society of Chemistry journal article supplement (doi:10.1039/d1re00208b), 2021-01-01
Supplement: d1re00208b1.pdf [file d1re00208b1.pdf]

**Supporting information**

**Highly effective production of levulinic acid and  $\gamma$ -valerolactone through self-circulation of solvent in continuous process**

Hongxing Wang,<sup>a,b</sup> Guoqiang Ding,<sup>c</sup> Yubo Liu,<sup>a,b</sup> Junbo Zhang,<sup>a,b</sup> Yulei Zhu<sup>\*a,c</sup> and Yongwang Li<sup>a,c</sup>

<sup>a</sup> State Key Laboratory of Coal Conversion, Institute of Coal Chemistry, Chinese Academy of Sciences, Taiyuan 030001, PR China. E-mail: zhuyulei@sxicc.ac.cn;

Fax: +86-351-7560668; Tel: +86-351-7117097

<sup>b</sup> University of Chinese Academy of Sciences, Beijing, 100049, PR China

<sup>c</sup> Synfuels China Co. Ltd, Beijing 101407, PR China

## 16 Computational formula

17 The conversion of Furfural alcohol (FOL) and the yields or selectivity of the products were  
18 quantified according to the following equations:

19

$$\text{Conversion (\%)} = \frac{\text{Mole of FOL converted (mol)}}{\text{Mole of FOL fed (mol)}} \times 100$$

20

$$\text{Selectivity (\%)} = \frac{\text{Mole of product produced (mol)}}{\text{Mole of FOL converted (mol)}} \times 100$$

21

22

23

$$\text{Yield (\%)} = \text{Selectivity (\%)} \times \text{Conversion (\%)}$$

## 24 BET analysis

25 **Table S1.** Textural properties of the samples obtained from BET analysis.

| Sample  | $S_{\text{BET}}$ (m <sup>2</sup> /g) | $S_{\text{mic}}$ (m <sup>2</sup> /g) | $V_{\text{tot}}$ (cm <sup>3</sup> /g) | $V_{\text{mic}}$ (cm <sup>3</sup> /g) |
|---------|--------------------------------------|--------------------------------------|---------------------------------------|---------------------------------------|
| ZSM-5   | 350.9                                | 307.0                                | 0.236                                 | 0.152                                 |
| $\beta$ | 496.7                                | 379.6                                | 0.527                                 | 0.186                                 |
| Y       | 646.9                                | 603.8                                | 0.368                                 | 0.298                                 |
| USY     | 636.4                                | 598.8                                | 0.377                                 | 0.294                                 |
| MCM-22  | 463.1                                | 336.1                                | 0.665                                 | 0.164                                 |

26  $S_{\text{BET}}$  is the specific surface area;  $S_{\text{mic}}$  and  $V_{\text{mic}}$  were calculated by t-plot method.

27

## 28 BET analysis

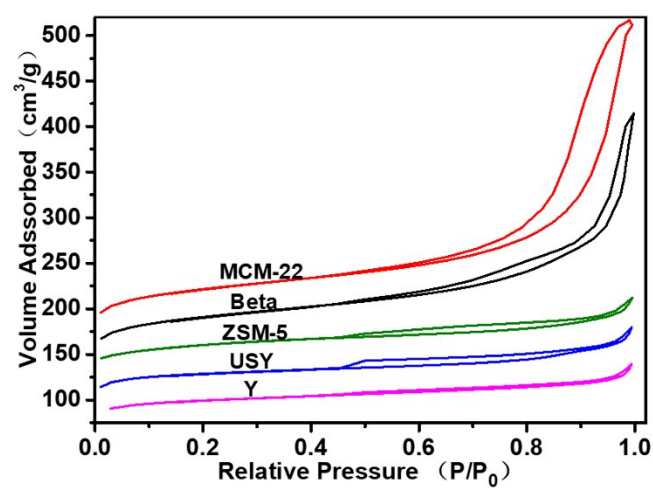

Figure S1. N<sub>2</sub> adsorption-desorption isotherms of the catalysts

31 **NH<sub>3</sub>-TPD analysis**

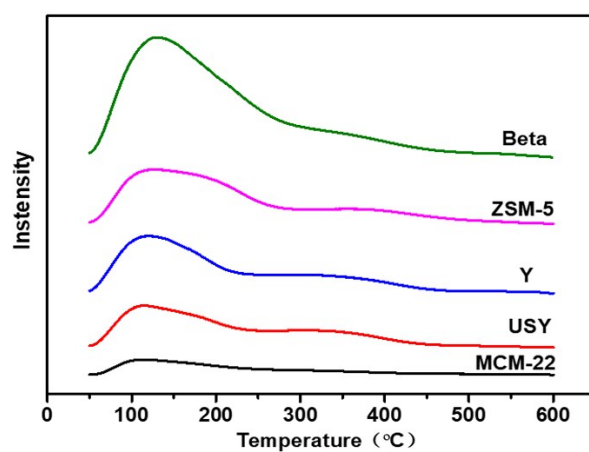

32  
33 **Figure S2.** Typical NH<sub>3</sub> - TPD profiles of catalytic materials.  
34

## 35 Investigation of reaction conditions

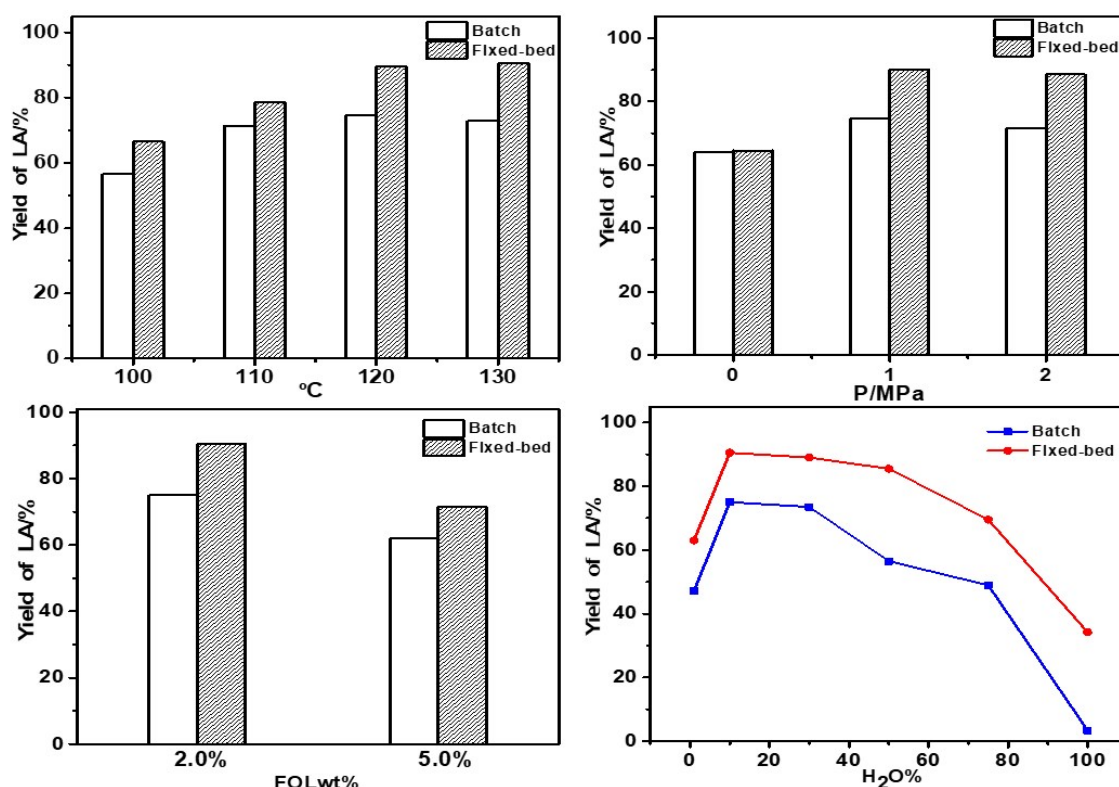

36  
37 **Figure S3.** The effects of reaction parameters on LA yield. Conditions: Batch: 40min. Fixed-bed: 5.0g Cat;  
38 Liquid hourly space velocity (LHSV)=0.024h<sup>-1</sup>;  $v_{\text{gas}}$ = 25ml/min.

39 Various reaction parameters such as temperature, pressure and so on were investigated, then the  
40 reaction results in the batch and fixed-bed reactors were systematically compared. As is shown in  
41 Figure S1, the yield of levulinic acid (LA) in the fixed-bed reactors was always higher than the  
42 yield in the batch reactors. In addition, the reaction results of two reactors have the same change  
43 trends when changing the reaction conditions. LA yield increased firstly with the temperature  
44 increasing, the reaction system tends to be stable when further increasing the reaction temperature  
45 to 130 °C. Reaction pressure is also a key parameter in the hydration of FOL, although an increase  
46 in the reaction pressure resulted in higher yield of levulinic acid, LA yield was similar at 1 MPa  
47 and 2 MPa, indicating that the reactions are not sensitive to pressure changes at  $P \geq 1.0$  MPa. The  
48 effects of FOL concentration on LA yield were also evaluated in two reactors, and yield of LA was  
49 significantly decreased with FOL concentration increases. In view of the above results, considering  
50 the reaction conditions and other aspects of the impact, 130 °C, 1 MPa was chosen as the optimum  
51 reaction parameters.

52 Water plays a crucial role in the formation of LA because it is an important participant in the  
53 hydrolysis of FOL. The effect of water content ranged from 1wt%-100wt% was then systematically

54 evaluated with  $\gamma$ -valerolactone (GVL) as reaction solvent. It can be seen from the data that the  
55 yield of LA increased firstly followed by a gradual decrease when water content increased. FOL  
56 has the particularity to polymerization in acidic aqueous solutions leading to low yield of LA.<sup>[1]</sup>  
57 The formation of polymers can be alleviated through hydrogen bonding and shielding effects by  
58 adding of organic solvents.<sup>[2]</sup> In short, despite the fact that excess H<sub>2</sub>O is unfavorable for obtaining  
59 high yield of LA, it is indispensable for the conversion of FOL.

## 60 TG-MS analysis

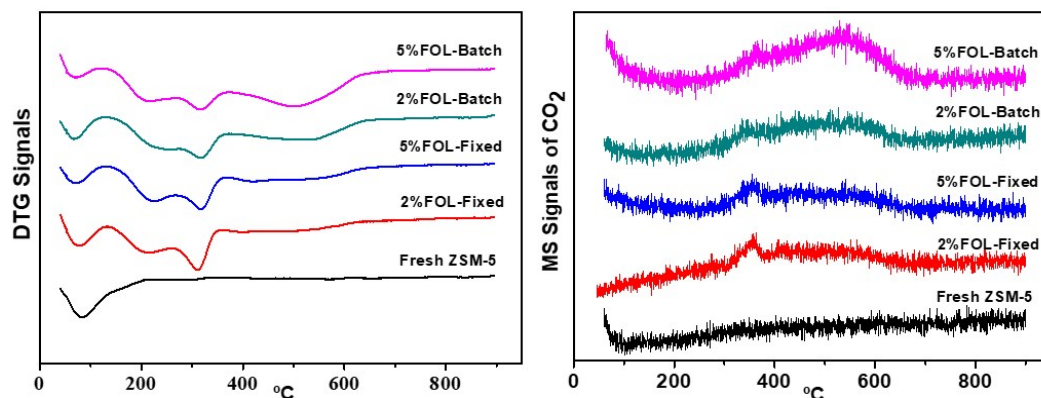

61  
 62 **Figure S4.** DTG curves of HZSM-5 in different reaction models recorded at 10°C/min and MS singles of CO<sub>2</sub>.  
 63 Reaction time is setted as 40min and 300min respectively for catalysts in the autoclaves and the fixed-bed  
 64 reactors, all samples were dried in 100°C for 120min before analysis of TGA.  
 65 In the mass spectrometry of CO<sub>2</sub>, decomposition peaks at around 350 °C and 550°C can be  
 66 attributed to the release of CO<sub>2</sub>, and the size of the peak area in the mass spectrum of CO<sub>2</sub> is related  
 67 to the amount of polymers deposited on the surface of the catalysts. Obviously, the polymers  
 68 deposited on the catalysts in the fixed bed reactors were obviously less than that of the counterpart  
 69 in the fixed bed reactors. In addition, as the FOL concentration increases, the reaction was more  
 70 prone to polymerization.

71 **Investigation of catalysts doses in the autoclaves**

72 **Table S2.** The effects of catalyst doses in the autoclaves

| Entry | m <sub>cat</sub> /g | Time/min | Conversion/% | Yield of LA/% |
|-------|---------------------|----------|--------------|---------------|
| 1     | 0.1                 | 40       | 99.6         | 66.6          |
| 2     | 0.2                 | 40       | 99.9         | 75.0          |
| 3     | 0.4                 | 40       | 99.9         | 75.5          |

Conditions: 15mL reaction solution (2wt%FOL+88wt%GVL+10wt%H<sub>2</sub>O); 130°C; 1.0MPa; 40min.

74 **Diagram of the direct conversion of FOL to GVL**

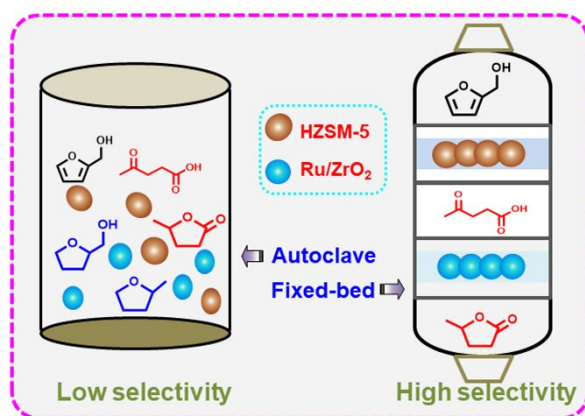

75  
76 **Figure S5.** Diagram of the direct conversion of FOL to GVL in different reactors.

## 78 HPLC analysis

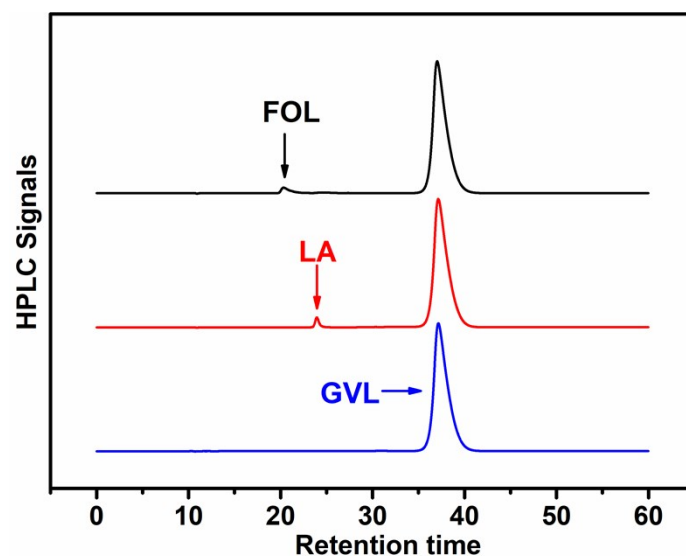

79  
 80 **Figure S6.** High Performance Liquid Chromatography of reaction mixtures at different reaction stage in the  
 81 fixed-bed reactors. Black line: reaction substrates; Red line: production of LA from FOL in the fixed-bed reactors,  
 82 130°C; 2.0 MPa; 5.0g HZSM-5;  $v(H_2) = 25\text{mL/min}$ ; LHSV=0.024h<sup>-1</sup>; Blue line: production of GVL from FOL  
 83 through “solvent self-circulation”, 130°C; 2.0MPa; 5.0g HZSM-5 + 4.0gRu/ZrO<sub>2</sub>;  $v(H_2) = 25\text{mL/min}$ ;  
 84 LHSV=0.024h<sup>-1</sup>.

85 **Notes and references**

86 [1] a)T. Kim, R. S. Assary, C. L. Marshall, D. J. Gosztola, L. A. Curtiss, P. C. Stair, *ChemCatChem* **2011**, 3, 1451-  
87 1458; b)T. Kim, R. S. Assary, H. Kim, C. L. Marshall, D. J. Gosztola, L. A. Curtiss, P. C. Stair, *Catalysis Today* **2013**,  
88 205, 60-66

89 [2] G. Falco, N. Guigo, L. Vincent, N. Sbirrazzuoli, *Polymers* **2018**, 10, 529

90
